# Supplementary material for: Design and validation of a programmable dual-tunnel soft pneumatic origami actuator with a large maximum shrinkage rate for reciprocating motion
Source: Copernicus journal article supplement (doi:10.5194/ms-16-61-2025), 2025-01-24
Supplement: Supplementary file 1 [file ms-16-61-2025-supplement.zip]

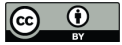

## *Supplement of*

# **Design and validation of a programmable dual-tunnel soft pneumatic origami actuator with a large maximum shrinkage rate for reciprocating motion**

**Rongna Xu et al.**

*Correspondence to:* Qiaoling Meng ([qiaoling\\_meng@126.com](mailto:qiaoling_meng@126.com))

- [ms-16-61-2025-supplement-title-page.pdf](#)
- [Movie S1.mp4](#)

The copyright of individual parts of the supplement might differ from the article licence.
